# Supplementary material for: Polygenic risk of idiopathic pulmonary fibrosis and COVID-19 severity
Source: bioRxiv or medRxiv preprint supplement (doi:10.1101/2023.06.12.23291269), 2023-06-13
Supplement: Supplementary file [file media-1.pdf]

# Polygenic risk of idiopathic pulmonary fibrosis and COVID-19 severity

## Supplementary material

Beatriz Guillen-Guio<sup>\*</sup>, Itahisa Marcelino-Rodriguez, Jose Miguel Lorenzo-Salazar, Olivia C Leavy, Richard J Allen, Scourge Cohort Group, José A. Riancho, Augusto Rojas, Pablo Lapunzina, Ángel Carracedo, Louise V Wain<sup>#</sup>, Carlos Flores<sup>#</sup>

<sup>\*</sup>Corresponding Author. *Email:* [bgg4@leicester.ac.uk](mailto:bgg4@leicester.ac.uk)

<sup>#</sup>Equal contribution as senior authors

## Contents

|                                         |    |
|-----------------------------------------|----|
| Supplemental Note .....                 | 2  |
| Supplementary Tables .....              | 2  |
| Supplementary Figures .....             | 6  |
| References .....                        | 9  |
| Banner Scourge .....                    | 10 |
| SCOURGE Cohort Group Members .....      | 10 |
| SCOURGE Cohort Group Affiliations ..... | 12 |

## Supplemental Note

**Research electronic data capture (REDCap)** is a secure, web-based software platform designed to support data capture for research studies, providing 1) an intuitive interface for validated data capture; 2) audit trails for tracking data manipulation and export procedures; 3) automated export procedures for seamless data downloads to common statistical packages; and 4) procedures for data integration and interoperability with external sources [1, 2].

## Supplementary Tables

**Table S1. IPF sentinel variants**

| Locus           | SNP ID                   | Chr. | Position (hg38) | Effect allele | Non-effect allele | OR [95% CI]      | P-value <sup>f</sup>    |
|-----------------|--------------------------|------|-----------------|---------------|-------------------|------------------|-------------------------|
| <i>KIF15</i>    | rs141979279 <sup>a</sup> | 3    | 44816639        | C             | T                 | 1.50 [1.33,1.70] | 1.21x10 <sup>-10</sup>  |
| <i>TERC</i>     | rs10936601 <sup>b</sup>  | 3    | 169810661       | C             | T                 | 0.79 [0.74,0.84] | 2.10x10 <sup>-15</sup>  |
| <i>FAM13A</i>   | rs2013701                | 4    | 88963935        | G             | T                 | 1.25 [1.18,1.32] | 4.60x10 <sup>-16</sup>  |
| <i>TERT</i>     | rs7725218                | 5    | 1282299         | G             | A                 | 1.41 [1.33,1.50] | 4.90x10 <sup>-32</sup>  |
| <i>DSP</i>      | rs2076295                | 6    | 7562999         | G             | T                 | 1.49 [1.41,1.57] | 1.50x10 <sup>-48</sup>  |
| <i>MAD1L1</i>   | rs12699415               | 7    | 1869843         | A             | G                 | 1.27 [1.20,1.34] | 7.85x10 <sup>-18</sup>  |
| <i>ZKSCAN1</i>  | rs2897075                | 7    | 100032719       | T             | C                 | 1.30 [1.23,1.37] | 1.77x10 <sup>-21</sup>  |
| <i>DEPTOR</i>   | rs28513081               | 8    | 119921886       | A             | G                 | 1.20 [1.13,1.27] | 1.22x10 <sup>-9</sup>   |
| <i>10q25.1</i>  | rs79684490               | 10   | 109470103       | A             | G                 | 1.40 [1.24,1.57] | 3.52x10 <sup>-8</sup>   |
| <i>MUC5B</i>    | rs35705950               | 11   | 1219991         | T             | G                 | 5.06 [4.69,5.47] | 9.09x10 <sup>-418</sup> |
| <i>ATP11A</i>   | rs12585036 <sup>c</sup>  | 13   | 112881427       | C             | T                 | 1.29 [1.21,1.38] | 5.99x10 <sup>-14</sup>  |
| <i>IVD</i>      | rs59424629               | 15   | 40428343        | T             | G                 | 1.27 [1.21,1.34] | 4.98x10 <sup>-19</sup>  |
| <i>KNL1</i>     | rs12912339               | 15   | 40639510        | A             | G                 | 1.30 [1.21,1.39] | 7.41x10 <sup>-13</sup>  |
| <i>AKAP13</i>   | rs62023891               | 15   | 85553985        | A             | G                 | 1.18 [1.12,1.25] | 1.32x10 <sup>-8</sup>   |
| <i>NPRL3</i>    | rs74614704               | 16   | 112241          | A             | G                 | 1.49 [1.34,1.67] | 2.57x10 <sup>-12</sup>  |
| <i>17q21.31</i> | rs3785884 <sup>d</sup>   | 17   | 45980229        | G             | A                 | 1.40 [1.30,1.51] | 2.53x10 <sup>-20</sup>  |
| <i>DPP9</i>     | rs35574495 <sup>e</sup>  | 19   | 4686976         | G             | T                 | 0.80 [0.75,0.86] | 1.08x10 <sup>-9</sup>   |
| <i>STMN3</i>    | rs112087793              | 20   | 63652817        | C             | T                 | 1.34 [1.21,1.48] | 1.09x10 <sup>-8</sup>   |
| <i>RTEL1</i>    | rs41308092               | 20   | 63693038        | A             | G                 | 1.75 [1.45,2.10] | 3.13x10 <sup>-9</sup>   |

<sup>a</sup>Proxy for rs78238620 ( $r^2=1$ ); <sup>b</sup>Proxy for rs12696304 ( $r^2=0.99$ ); <sup>c</sup>Proxy for rs9577395 ( $r^2=0.98$ ); <sup>d</sup>Proxy for rs2077551 ( $r^2=0.83$ ); <sup>e</sup>Proxy for rs12610495 ( $r^2=0.36$ ); <sup>f</sup>Significance of the association in the GWAS of IPF susceptibility [3]. Linkage disequilibrium ( $r^2$ ) proxies were defined using 1000 genomes European sample data. Data for the *SPDL1* locus in SCOURGE was no available given the rarity (<1%) of the IPF risk variant in the general population [4].

**Table S2. Validation of IPF PRS associations with COVID-19 severity using an alternative PRS estimation method**

| COVID-19 severity | Category          | PRsice-2*             |         |                     |                       | megaPRS             |                       |
|-------------------|-------------------|-----------------------|---------|---------------------|-----------------------|---------------------|-----------------------|
|                   |                   | PT                    | Num_SNP | OR (95%CI)          | P-Value               | OR (95%CI)          | P-Value               |
| Hospitalisation   | All individuals   | 2.10x10 <sup>-3</sup> | 2,939   | 1.08<br>(1.04,1.12) | 7.90x10 <sup>-5</sup> | 1.07<br>(1.03,1.11) | 1.27x10 <sup>-3</sup> |
|                   | Males             | 7.85x10 <sup>-3</sup> | 8,686   | 1.09<br>(1.04,1.16) | 1.28x10 <sup>-3</sup> | 1.08<br>(1.02,1.14) | 9.10x10 <sup>-3</sup> |
|                   | <60 years         | 4.70x10 <sup>-3</sup> | 5,660   | 1.12<br>(1.06,1.19) | 3.44x10 <sup>-5</sup> | 1.10<br>(1.04,1.16) | 1.17x10 <sup>-3</sup> |
|                   | <60 years Males   | 4.70x10 <sup>-3</sup> | 5,660   | 1.16<br>(1.08,1.25) | 6.39x10 <sup>-5</sup> | 1.13<br>(1.05,1.21) | 1.55x10 <sup>-3</sup> |
| Severe illness    | All individuals   | 6.65x10 <sup>-3</sup> | 7,566   | 1.08<br>(1.04,1.13) | 2.57x10 <sup>-4</sup> | 1.06<br>(1.02,1.11) | 4.80x10 <sup>-3</sup> |
|                   | <60 years         | 3.30x10 <sup>-3</sup> | 4,198   | 1.14<br>(1.07,1.22) | 1.53x10 <sup>-4</sup> | 1.14<br>(1.06,1.22) | 1.79x10 <sup>-4</sup> |
|                   | <60 years Males   | 5.05x10 <sup>-3</sup> | 6,009   | 1.16<br>(1.06,1.27) | 9.98x10 <sup>-4</sup> | 1.18<br>(1.08,1.29) | 2.02x10 <sup>-4</sup> |
| Critical illness  | All individuals   | 0.014                 | 13,828  | 1.12<br>(1.06,1.20) | 2.49x10 <sup>-4</sup> | 1.08<br>(1.01,1.15) | 0.017                 |
|                   | Females           | 0.053                 | 41,838  | 1.23<br>(1.10,1.39) | 3.67x10 <sup>-4</sup> | 1.14<br>(1.01,1.27) | 0.029                 |
|                   | <60 years         | 0.129                 | 84,188  | 1.44<br>(1.16,1.78) | 8.97x10 <sup>-4</sup> | 1.09<br>(0.88,1.34) | 0.426                 |
|                   | <60 years Females |                       |         |                     |                       |                     |                       |

\*Association results for the best prediction model resulting from PRsice-2 in significant categories ( $p \leq 1.85 \times 10^{-3}$ ). The PRsice-2 PRS includes all variants reaching the best P-value threshold in the IPF GWAS.  
 PC: Principal Components, PT: Best fit P-value Threshold; Num\_SNP: Number of SNPs included in the best model.

**Table S3. Association of IPF whole-genome PRS with COVID-19 hospitalisation in the entire sample vs. after excluding patients with clinical history of chronic respiratory diseases**

| COVID-19 hospitalisation category* | All individuals (Nt=15,024) |                  |                       | Excluding chronic diseases (Nt=14,132) † |                  |                       |
|------------------------------------|-----------------------------|------------------|-----------------------|------------------------------------------|------------------|-----------------------|
|                                    | PT                          | OR (95% CI)      | P-value               | PT                                       | OR (95% CI)      | P-value               |
| All                                | 2.10x10 <sup>-3</sup>       | 1.08 (1.04,1.12) | 7.90x10 <sup>-5</sup> | 2.30x10 <sup>-3</sup>                    | 1.09 (1.04,1.13) | 4.31x10 <sup>-5</sup> |
| Males                              | 7.85x10 <sup>-3</sup>       | 1.09 (1.04,1.16) | 1.28x10 <sup>-3</sup> | 7.85x10 <sup>-3</sup>                    | 1.10 (1.04,1.17) | 7.89x10 <sup>-4</sup> |
| <60 years                          | 4.70x10 <sup>-3</sup>       | 1.12 (1.06,1.19) | 3.44x10 <sup>-5</sup> | 4.70x10 <sup>-3</sup>                    | 1.13 (1.07,1.20) | 2.62x10 <sup>-5</sup> |
| <60 years Males                    | 4.70x10 <sup>-3</sup>       | 1.16 (1.08,1.25) | 6.39x10 <sup>-5</sup> | 4.70x10 <sup>-3</sup>                    | 1.17 (1.08,1.26) | 7.08x10 <sup>-5</sup> |

Association results for the best prediction model resulting from PRsice-2. Nt: total sample size; PT: Best fit P-value Threshold.  
 †A total of 892 patients with chronic respiratory diseases were excluded

**Table S4. Association of IPF whole-genome PRS with COVID-19 hospitalisation including or excluding population controls**

| COVID-19 hospitalisation category | Non-hospitalised COVID-19 + population controls |                 |                  |                       | Non-hospitalised COVID-19 controls |                 |                  |                       |
|-----------------------------------|-------------------------------------------------|-----------------|------------------|-----------------------|------------------------------------|-----------------|------------------|-----------------------|
|                                   | PT                                              | Cases/Controls* | OR (95% CI)      | P-value               | PT                                 | Cases/Controls* | OR (95% CI)      | P-value               |
| All                               | 2.10x10 <sup>-3</sup>                           | 5,968/9,056     | 1.08 (1.04,1.12) | 7.90x10 <sup>-5</sup> | 2.30x10 <sup>-3</sup>              | 5,968/3,382     | 1.06 (1.01,1.12) | 0.020                 |
| Males                             | 7.85x10 <sup>-3</sup>                           | 3,441/3,958     | 1.09 (1.04,1.16) | 1.28x10 <sup>-3</sup> | 0.049                              | 3,441/912       | 1.07 (1.01,1.13) | 0.114                 |
| <60 years                         | 4.70x10 <sup>-3</sup>                           | 1,607/6,457     | 1.12 (1.06,1.19) | 3.44x10 <sup>-5</sup> | 0.069                              | 1,607/2,567     | 1.12 (1.05,1.20) | 1.07x10 <sup>-3</sup> |
| <60 years Males                   | 4.70x10 <sup>-3</sup>                           | 987/2,904       | 1.16 (1.08,1.25) | 6.39x10 <sup>-5</sup> | 7.85x10 <sup>-3</sup>              | 987/649         | 1.12 (1.02,1.24) | 0.020                 |

Association results for the best prediction model resulting from PRSice-2. PT: Best fit P-value Threshold. \*A total of 281 individuals had missing data for sex (n=4) and age (n=277).

**Table S5. Association of IPF whole-genome PRS with 90-day COVID-19 mortality**

| COVID-19 mortality category | Covariates     | All individuals (Nt: 758 cases and 7,508 controls) |                  |         | Excluding chronic respiratory diseases (Nt: 649 cases and 6,797 controls)† |                  |         |
|-----------------------------|----------------|----------------------------------------------------|------------------|---------|----------------------------------------------------------------------------|------------------|---------|
|                             |                | PT                                                 | OR (95% CI)      | P-value | PT                                                                         | OR (95% CI)      | P-value |
| All                         | Age, Sex, 10PC | 1.70x10 <sup>-3</sup>                              | 1.11 (1.02,1.20) | 0.012   | 1.70x10 <sup>-3</sup>                                                      | 1.11 (1.01,1.21) | 0.023   |
| Males                       | Age, 10PC      | 8.5x10 <sup>-4</sup>                               | 1.14 (1.03,1.27) | 0.014   | 1.00x10 <sup>-4</sup>                                                      | 1.16 (1.03,1.31) | 0.012   |
| Females                     | Age, 10PC      | 5.0x10 <sup>-4</sup>                               | 1.10 (0.96,1.25) | 0.157   | 4.3x10 <sup>-3</sup>                                                       | 1.07 (0.93,1.22) | 0.336   |
| ≥60 years                   | Sex, 10PC      | 9.5x10 <sup>-4</sup>                               | 1.09 (1.01,1.18) | 0.033   | 9.5x10 <sup>-4</sup>                                                       | 1.08 (0.99,1.18) | 0.081   |
| <60 years                   | Sex, 10PC      | 4.5x10 <sup>-4</sup>                               | 1.27 (0.99,1.65) | 0.063   | 0.011                                                                      | 1.27 (0.97,1.66) | 0.083   |
| ≥60 years Males             | 10PC           | 1.00x10 <sup>-3</sup>                              | 1.13 (1.01,1.26) | 0.028   | 1.00x10 <sup>-4</sup>                                                      | 1.16 (1.02,1.30) | 0.019   |
| ≥60 years Females           | 10PC           | 0.416                                              | 0.91 (0.80,1.03) | 0.149   | 0.351                                                                      | 0.90 (0.79,1.03) | 0.121   |
| <60 years Males             | 10PC           | 0.460                                              | 0.75 (0.53,1.06) | 0.108   | 0.460                                                                      | 0.74 (0.51,1.06) | 0.097   |
| <60 years Females           | 10PC           | 0.011                                              | 1.55 (1.03,2.34) | 0.035   | 0.011                                                                      | 1.64 (1.07,2.53) | 0.024   |

PRSice-2 association results for the best prediction model in each category. †A total of 820 patients with chronic respiratory diseases were excluded. Nt: total sample size; PC: Principal Components; PT: Best fit P-value Threshold. Validation significance declared at  $p < 5.6 \times 10^{-3}$  after Bonferroni correction (0.05/9 tests).

**Table S6. Association with COVID-19 hospitalisation after excluding the *MUC5B* locus**

|                                   |                |                       | Whole-genome PRS      |                  |                       | Sentinels PRS†   |                       |
|-----------------------------------|----------------|-----------------------|-----------------------|------------------|-----------------------|------------------|-----------------------|
| COVID-19 hospitalisation category | Covariates     | <i>MUC5B</i> included | PT                    | OR (95% CI)      | P-value*              | OR (95%CI)       | P-value               |
| All                               | Age, Sex, 10PC | Yes                   | 2.10x10 <sup>-3</sup> | 1.08 (1.04,1.12) | 7.90x10 <sup>-5</sup> | 1.01 (0.97,1.05) | 0.772                 |
|                                   |                | No                    | 2.10x10 <sup>-3</sup> | 1.09 (1.05,1.14) | 5.55x10 <sup>-6</sup> | 1.06 (1.02,1.10) | 0.005                 |
| Males                             | Age, 10PC      | Yes                   | 7.85x10 <sup>-3</sup> | 1.09 (1.04,1.16) | 1.28x10 <sup>-3</sup> | 1.05 (0.99,1.10) | 0.107                 |
|                                   |                | No                    | 7.85x10 <sup>-3</sup> | 1.10 (1.04,1.17) | 4.39x10 <sup>-4</sup> | 1.12 (1.06,1.18) | 7.55x10 <sup>-5</sup> |
| <60 years                         | Sex, 10PC      | Yes                   | 4.70x10 <sup>-3</sup> | 1.12 (1.06,1.19) | 3.44x10 <sup>-5</sup> | 1.02 (0.97,1.08) | 0.415                 |
|                                   |                | No                    | 4.70x10 <sup>-3</sup> | 1.14 (1.08,1.21) | 3.11x10 <sup>-6</sup> | 1.10 (1.04,1.16) | 9.34x10 <sup>-4</sup> |
| <60 years Males                   | 10PC           | Yes                   | 4.70x10 <sup>-3</sup> | 1.16 (1.08,1.25) | 6.39x10 <sup>-5</sup> | 1.08 (1.00,1.16) | 0.039                 |
|                                   |                | No                    | 4.70x10 <sup>-3</sup> | 1.19 (1.10,1.28) | 5.56x10 <sup>-6</sup> | 1.19 (1.10,1.28) | 3.67x10 <sup>-6</sup> |

To assess the PRS models after excluding *MUC5B*, the *MUC5B* promoter variant rs35705950 and variants within ±1 Mb were removed from the analyses. PC: Principal Components; PT: Best fit P-value Threshold. \*PRSice-2 association results for the best prediction model in each category. †Association results for PRS calculated using the 19 previously reported genome-wide significant IPF common risk variants shown in Table S1. No thresholding was applied to sentinels PRS analyses.

**Table S7. Results from the pathway specific PRS analyses**

| Pathway [Number of SNPs included in the PRS*]                                  | COVID-19 hospitalisation category | Co-variables   | OR (95%CI)        | P-value      |
|--------------------------------------------------------------------------------|-----------------------------------|----------------|-------------------|--------------|
| Cadherin pathway [69]                                                          | All                               | Age, Sex, 10PC | 1.03 (0.99, 1.07) | 0.171        |
|                                                                                | Males                             | Age, 10PC      | 1.06 (1.01, 1.12) | <b>0.028</b> |
|                                                                                | <60 years                         | Sex, 10PC      | 1.03 (0.98, 1.09) | 0.249        |
|                                                                                | <60 years Males                   | 10PC           | 1.07 (1.00, 1.15) | 0.057        |
| Wnt pathway [102]                                                              | All                               | Age, Sex, 10PC | 1.01 (0.97, 1.05) | 0.531        |
|                                                                                | Males                             | Age, 10PC      | 1.02 (0.96, 1.07) | 0.584        |
|                                                                                | <60 years                         | Sex, 10PC      | 1.02 (0.96, 1.08) | 0.524        |
|                                                                                | <60 years Males                   | 10PC           | 1.02 (0.95, 1.09) | 0.649        |
| Integrin pathway [73]                                                          | All                               | Age, Sex, 10PC | 1.03 (0.99, 1.07) | 0.103        |
|                                                                                | Males                             | Age, 10PC      | 1.03 (0.97, 1.08) | 0.352        |
|                                                                                | <60 years                         | Sex, 10PC      | 1.08 (1.02, 1.14) | <b>0.007</b> |
|                                                                                | <60 years Males                   | 10PC           | 1.07 (0.99, 1.15) | 0.078        |
| Heterotrimeric G-protein signaling pathway-Gq alpha and Go alpha mediated [50] | All                               | Age, Sex, 10PC | 1.00 (0.96, 1.04) | 0.872        |
|                                                                                | Males                             | Age, 10PC      | 0.97 (0.91, 1.02) | 0.214        |
|                                                                                | <60 years                         | Sex, 10PC      | 1.00 (0.95, 1.06) | 0.907        |
|                                                                                | <60 years Males                   | 10PC           | 0.99 (0.92, 1.06) | 0.737        |
| Heterotrimeric G-protein signaling pathway-Gi alpha and Gs alpha mediated [60] | All                               | Age, Sex, 10PC | 1.01 (0.97, 1.05) | 0.642        |
|                                                                                | Males                             | Age, 10PC      | 0.99 (0.93, 1.04) | 0.352        |
|                                                                                | <60 years                         | Sex, 10PC      | 1.03 (0.97, 1.09) | 0.320        |
|                                                                                | <60 years Males                   | 10PC           | 0.99 (0.92, 1.07) | 0.844        |

\*SNPs reaching a P-value Threshold of 2.1x10<sup>-3</sup> (i.e., the best fit P-value Threshold when considering all hospitalised individuals). PC: Principal Components; SNP: single nucleotide polymorphism.

## Supplementary Figures

**Figure S1. High-resolution PRSice-2 plot for the association of IPF PRS with COVID-19 hospitalisation.** The best-fit PRS is obtained at P-value Threshold (PT) of  $2.10 \times 10^{-3}$ , with a whole-genome PRS model including 2,939 variants from the GWAS of IPF dataset.

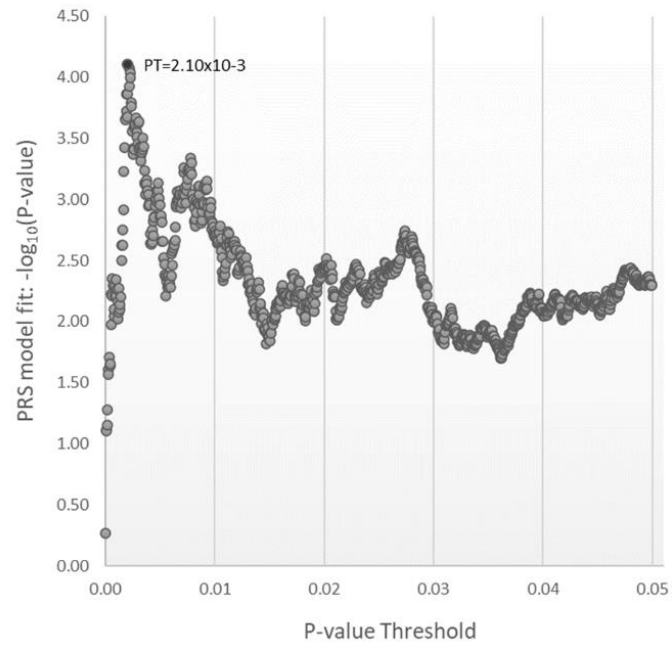

**Figure S2. Pathway enrichment analysis for genetic factors included in the best-fit model of association of IPF whole-genome PRS with COVID-19 hospitalisation for all individuals.** A) Analyses including all 2,939 SNPs used to calculate the PRS and their 3,471 mapping genes. B) Analyses excluding the 19 previously reported IPF common loci (sentinels  $\pm 1$ MB) (2,709 SNPs and 3,291 mapping genes left). All analyses were performed with ShinyGO v0.77 [5]. Top five biological pathways according to PANTHER database are shown.

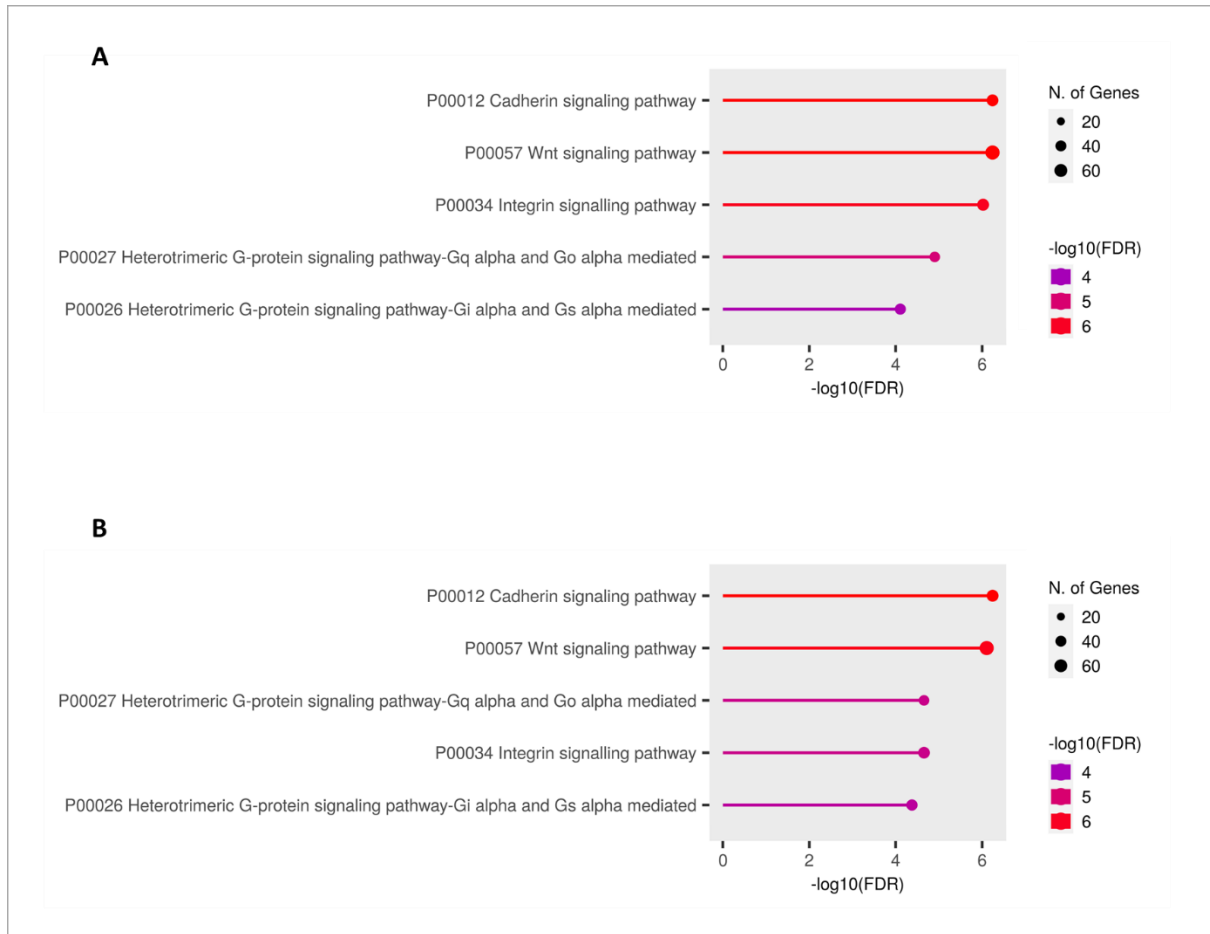

**Figure S3. Pathway enrichment analysis for genetic factors included in the best-fit model of association of IPF whole-genome PRS with COVID-19 hospitalisation for <60 years males.** Analyses including 5,660 SNPs used to calculate the PRS and their 5,424 mapping genes. Analyses were performed with ShinyGO v0.77 [5]. Top five biological pathways according to PANTHER database are shown.

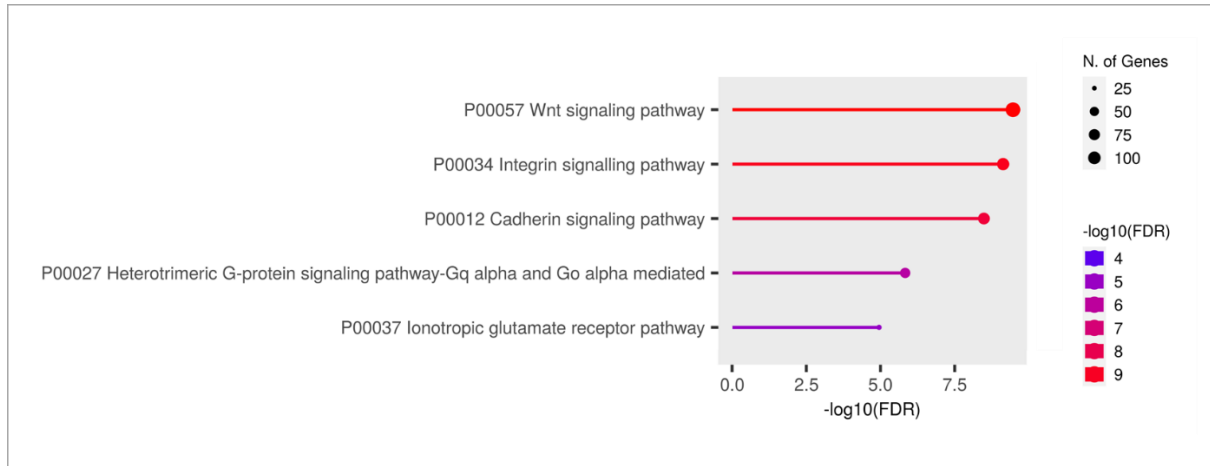



## References

1. Harris PA, Taylor R, Thielke R, Payne J, Gonzalez N, Conde JG: Research electronic data capture (REDCap)--a metadata-driven methodology and workflow process for providing translational research informatics support. *J Biomed Inform* 2009, 42(2):377-381.
2. Harris PA, Taylor R, Minor BL, Elliott V, Fernandez M, O'Neal L, McLeod L, Delacqua G, Delacqua F, Kirby J *et al*: The REDCap consortium: Building an international community of software platform partners. *J Biomed Inform* 2019, 95:103208.
3. Allen RJ, Stockwell A, Oldham JM, Guillen-Guio B, Schwartz DA, Maher TM, Flores C, Noth I, Yaspan BL, Jenkins RG *et al*: Genome-wide association study across five cohorts identifies five novel loci associated with idiopathic pulmonary fibrosis. *Thorax* 2022, 77(8):829-833.
4. Dhindsa RS, Mattsson J, Nag A, Wang Q, Wain LV, Allen R, Wigmore EM, Ibanez K, Vitsios D, Deevi SVV *et al*: Identification of a missense variant in SPDL1 associated with idiopathic pulmonary fibrosis. *Commun Biol* 2021, 4(1):392.
5. Ge SX, Jung D, Yao R: ShinyGO: a graphical gene-set enrichment tool for animals and plants. *Bioinformatics* 2020, 36(8):2628-2629.

# Banner Scourge

26/09/2022

## SCOURGE Cohort Group Members

Javier Abellan<sup>1,2</sup>; René Acosta-Isaac<sup>3</sup>; Jose María Aguado<sup>4,5,6,7</sup>; Carlos Aguilar<sup>8</sup>; Sergio Aguilera-Albesa<sup>9,10</sup>; Abdolah Ahmadi Sabbagh<sup>11</sup>; Jorge Alba<sup>12</sup>; Sergiu Albu<sup>13,14,15</sup>; Karla A.M. Alcalá-Gallardo<sup>16</sup>; Julia Alcoba-Florez<sup>17</sup>; Sergio Alcolea Batres<sup>18</sup>; Holmes Rafael Algarin-Lara<sup>19,20</sup>; Virginia Almadana<sup>21</sup>; Julia Almeida<sup>22,23,24,25</sup>; Berta Almoguera<sup>26,27</sup>; María R. Alonso<sup>28</sup>; Nuria Alvarez<sup>28</sup>; Yady Álvarez-Benítez<sup>19,20</sup>; Felipe Álvarez-Navia<sup>29,30</sup>; Rodolfo Alvarez-Sala Walther<sup>18</sup>; Álvaro Andreu-Bernabeu<sup>31,6</sup>; Maria Rosa Antonijoan<sup>32</sup>; Eunat Arana-Arri<sup>33,34</sup>; Carlos Aranda<sup>35,36</sup>; Celso Arango<sup>31,37,6</sup>; Carolina Araque<sup>38,39</sup>; Nathalia K. Araujo<sup>40</sup>; Izabel M.T. Araujo<sup>41</sup>; Ana C. Arcanjo<sup>42,43,44</sup>; Ana Arnaiz<sup>45,46,47</sup>; Francisco Arnalich Fernández<sup>48</sup>; María J. Arranz<sup>49</sup>; José Ramon Arribas Lopez<sup>48</sup>; Maria-Jesus Artiga<sup>50</sup>; Yubelly Avello-Malaver<sup>51</sup>; Carmen Ayuso<sup>26,27</sup>; Ana María Baldion<sup>51</sup>; Belén Ballina Martín<sup>11</sup>; Raúl C. Baptista-Rosas<sup>52,53,54</sup>; Andrea Barranco-Díaz<sup>20</sup>; María Barreda- Sánchez<sup>55,56</sup>; Viviana Barrera-Penagos<sup>51</sup>; Moncef Belhassen-García<sup>57,30</sup>; Enrique Bernal<sup>55</sup>; David Bernal-Bello<sup>58</sup>; Joao F. Bezerra<sup>59</sup>; Marcos A.C. Bezerra<sup>60</sup>; Natalia Blanca-López<sup>61</sup>; Rafael Blancas<sup>62</sup>; Lucía Boix-Palop<sup>63</sup>; Alberto Borobia<sup>64</sup>; Elsa Bravo<sup>65</sup>; María Brion<sup>66,67</sup>; Óscar Brochado-Kith<sup>68,7</sup>; Ramón Brugada<sup>69,70,67,71</sup>; Matilde Bustos<sup>72</sup>; Alfonso Cabello<sup>73</sup>; Juan J. Caceres-Agra<sup>74</sup>; Esther Calbo<sup>75</sup>; Enrique J. Calderón<sup>76,77,78</sup>; Shirley Camacho<sup>79</sup>; Marcela C. Campos<sup>42</sup>; Yolanda Cañadas<sup>36</sup>; Cristina Carbonell<sup>29,30</sup>; Servando Cardona-Huerta<sup>80</sup>; Antonio Augusto F. Carioca<sup>81</sup>; Maria Sanchez Carpintero<sup>35,36</sup>; Carlos Carpio Segura<sup>18</sup>; Thássia M.T. Carratto<sup>82</sup>; José Antonio Carrillo-Avila<sup>83</sup>; Maria C.C. Carvalho<sup>84</sup>; Carlos Casasnovas<sup>85,86,27</sup>; Luis Castano<sup>33,87,27,88,89</sup>; Carlos F. Castaño<sup>35,36</sup>; Jose E. Castelao<sup>90</sup>; Aranzazu Castellano Candalija<sup>91</sup>; María A. Castillo<sup>79</sup>; Francisco C. Ceballos<sup>68</sup>; Jessica G. Chaux<sup>39</sup>; Walter G. Chaves- Santiago<sup>92,39</sup>; Sylena Chiquillo-Gómez<sup>19,20</sup>; Marco A. Cid-Lopez<sup>16</sup>; Oscar Cienfuegos-Jimenez<sup>80</sup>; Rosa Conde-Vicente<sup>93</sup>; M. Lourdes Cordero-Lorenzana<sup>94</sup>; Dolores Corella<sup>95,96</sup>; Almudena Corrales<sup>97,98</sup>; Jose L. Cortes-Sanchez<sup>80,99</sup>; Marta Corton<sup>26,27</sup>; Tatiana X. Costa<sup>100</sup>; Raquel Cruz<sup>101,27,102,103</sup>; Marina S. Cruz<sup>40</sup>; Luisa Cuesta<sup>104</sup>; Gabriela C.R. Cunha<sup>105</sup>; Gabriela V. da Silva<sup>41</sup>; David Dalmau<sup>106,75</sup>; Raquel C.S. Dantas-Komatsu<sup>40</sup>; M. Teresa Darnaude<sup>107</sup>; Raimundo de Andrés<sup>108</sup>; Jéssica N.G. de Araújo<sup>109</sup>; Carmen de Juan<sup>110</sup>; Juan De la Cruz Troca<sup>111,112,77</sup>; Carmen de la Horra<sup>78</sup>; Ana B. de la Hoz<sup>33</sup>; Alba De Martino-Rodríguez<sup>113,114</sup>; Julianna Lys de Sousa Alves Neri<sup>115</sup>; Victor del Campo-Pérez<sup>116</sup>; Juan Delgado-Cuesta<sup>117</sup>; Covadonga M. Diaz-Caneja<sup>31,37,6</sup>; Anderson Díaz-Pérez<sup>20</sup>; Aranzazu Diaz de Bustamante<sup>107</sup>; Beatriz Dietl<sup>75</sup>; Silvia Diz-de Almeida<sup>27,103</sup>; Manoella do Monte Alves<sup>118,119</sup>; Elena Domínguez-Garrido<sup>120</sup>; Katiusse A. dos Santos<sup>84</sup>; Alice M. Duarte<sup>41</sup>; Jose Echave-Sustaeta<sup>121</sup>; Rocío Eiros<sup>122</sup>; César O. Enciso-Olivera<sup>38,39</sup>; Gabriela Escudero<sup>123</sup>; Pedro Pablo España<sup>124</sup>; Gladys Mercedes Estigarribia Sanabria<sup>125</sup>; María Carmen Fariñas<sup>45,46,47</sup>; Marianne R. Fernandes<sup>126,127</sup>; Ramón Fernández<sup>45,128</sup>; Lidia Fernandez-Caballero<sup>26,27</sup>; Ana Fernández-Cruz<sup>129</sup>; María J. Fernandez-Nestosa<sup>130</sup>; Uxía Fernández-Robelo<sup>131</sup>; Amanda Fernández-Rodríguez<sup>68,7</sup>; Marta Fernández-Sampedro<sup>45,47,46</sup>; Ruth Fernández-Sánchez<sup>26,27</sup>; Tania Fernández-Villa<sup>132</sup>; Silvia Fernández Ferrero<sup>11</sup>; Yolanda Fernández Martínez<sup>11</sup>; Carmen Fernández Capitán<sup>91</sup>; Patricia Flores-Pérez<sup>133</sup>; Vicente Friaza<sup>77,78</sup>; Lácides Fuenmayor-Hernández<sup>20</sup>; Marta Fuertes Núñez<sup>11</sup>; Victoria Fumadó<sup>134</sup>; Ignacio Gadea<sup>135</sup>; Lidia Gagliardi<sup>35,36</sup>; Manuela Gago-Domínguez<sup>136,102</sup>; Natalia Gallego<sup>137</sup>; Cristina Galoppo<sup>138</sup>; Inés García<sup>26,27</sup>; Mercedes García<sup>35,36</sup>; Leticia García<sup>35,36</sup>; Carlos Garcia-Cerrada<sup>1,2,139</sup>; Aitor García-de-Vicuña<sup>33,140</sup>; Josefina García-García<sup>55</sup>; Irene García-García<sup>64</sup>; Carmen García-Ibarbia<sup>45,47,46</sup>; Andrés C. García-Montero<sup>141</sup>; Ana García-Soidán<sup>142</sup>; Elisa García-Vázquez<sup>55</sup>; María Carmen García Torrejón<sup>143,2</sup>; Emiliano Garza-Frias<sup>80</sup>; Angela Gentile<sup>138</sup>; Belén Gil-Fournier<sup>144</sup>; Javier Gómez-Arrue<sup>113,114</sup>; Mario Gómez-Duque<sup>92,39</sup>; Luis Gómez Carrera<sup>18</sup>; María Gómez García<sup>101</sup>; Ángela Gómez Sacristán<sup>145</sup>; Anna González-Neira<sup>28</sup>; Javier González-Peñas<sup>31,6,37</sup>; Manuel Gonzalez-Sagrado<sup>93</sup>; Beatriz González Álvarez<sup>113,114</sup>; Fernan Gonzalez Bernaldo de Quirós<sup>146</sup>; Hugo Gonzalo Benito<sup>147</sup>; Oscar Gorgojo-Galindo<sup>148</sup>; Miguel Górgolas<sup>73</sup>; Florencia Guaragna<sup>138</sup>; Genilson P. Guegel<sup>149</sup>; Beatriz Guillen-Guio<sup>97</sup>; Encarna Guillen-Navarro<sup>55,150,151,152</sup>; Pablo Guisado-Vasco<sup>121</sup>; Juan F. Gutiérrez-Bautista<sup>153</sup>; Luz D. Gutierrez-Castañeda<sup>154,39</sup>; Sarah Heili-Frades<sup>155</sup>; Estefania Hernandez<sup>156</sup>; Luis D. Hernandez-Ortega<sup>157,158</sup>; Guillermo Hernández-Pérez<sup>29</sup>; Rebeca Hernández-Vaquero<sup>159</sup>; Cristina Hernández Moro<sup>11</sup>; Belen

Herraez<sup>28</sup>; M. Teresa Herranz<sup>55</sup>; María Herrera<sup>35,36</sup>; María José Herrero<sup>160,161</sup>; Antonio Herrero-Gonzalez<sup>162</sup>; Juan P. Horcajada<sup>163,164,14,165,7</sup>; Natale Imaz-Ayo<sup>33</sup>; Maider Intxausti-Urrutibeaskoa<sup>166</sup>; María Íñiguez<sup>167</sup>; Rafael H. Jacomo<sup>168</sup>; Rubén Jara<sup>55</sup>; Perez Maria Jazmin<sup>138</sup>; Ángel Jiménez<sup>35,36</sup>; Pilar Jiménez<sup>153</sup>; Ignacio Jiménez-Alfaro<sup>169</sup>; María A. Jimenez-Sousa<sup>68,7</sup>; Iolanda Jordan<sup>170,171,77</sup>; Rocío Laguna-Goya<sup>172,173</sup>; Daniel Laorden<sup>18</sup>; María Lasa-Lazaro<sup>172,173</sup>; María Claudia Lattig<sup>79,174</sup>; Ailen Lauriente<sup>138</sup>; Anabel Liger Borja<sup>175</sup>; Lucía Llanos<sup>176</sup>; Amparo López-Bernús<sup>29,30</sup>; Esther Lopez-García<sup>111,112,77,177</sup>; Rosario Lopez-Rodriguez<sup>26,27</sup>; Miguel A. López-Ruz<sup>178,179,180</sup>; Eduardo López Granados<sup>181,182,27</sup>; Leonardo Lorente<sup>183</sup>; José E. Lozano<sup>184</sup>; María Lozano-Espinosa<sup>175</sup>; Andre D. Luchessi<sup>185</sup>; Ignacio Mahillo<sup>186,187,98</sup>; Esther Mancebo<sup>172,173</sup>; Carmen Mar<sup>124</sup>; Cristina Marcelo Calvo<sup>91</sup>; Miguel Marcos<sup>29,30</sup>; Alba Marcos-Delgado<sup>188</sup>; Alicia Marín Candón<sup>64</sup>; Pablo Mariscal Aguilar<sup>18</sup>; María M. Martín<sup>189</sup>; María Dolores Martín<sup>190</sup>; Vicente Martín<sup>188,77</sup>; Marta Martín-Fernandez<sup>191</sup>; Caridad Martín-López<sup>175</sup>; José-Ángel Martín-Oterino<sup>29,30</sup>; Laura Martín-Pedraza<sup>61</sup>; María Martín-Vicente<sup>68</sup>; Amalia Martínez<sup>192</sup>; Ricardo Martínez<sup>156</sup>; Juan José Martínez<sup>86,27</sup>; Silvia Martínez<sup>45,47</sup>; Eleno Martínez-Aquino<sup>193</sup>; Óscar Martínez-González<sup>194</sup>; Iciar Martínez-Lopez<sup>195,196</sup>; Oscar Martinez-Nieto<sup>51,174</sup>; Pedro Martinez-Paz<sup>147</sup>; Angel Martinez-Perez<sup>197</sup>; Andrea Martínez-Ramas<sup>26,27</sup>; Michel F. Martinez-Resendez<sup>80</sup>; Violeta Martínez Robles<sup>11</sup>; Laura Marzal<sup>26,27</sup>; Juliana F. Mazzeu<sup>198,199,200</sup>; Jeane F.P. Medeiros<sup>40</sup>; Kelliane A. Medeiros<sup>201,202</sup>; Francisco J. Medrano<sup>76,77,78</sup>; Xose M. Meijome<sup>203,204</sup>; Natalia Mejuto-Montero<sup>205</sup>; Ana Méndez-Echevarria<sup>206</sup>; Humberto Mendoza Charris<sup>65,20</sup>; Eleuterio Merayo Macías<sup>207</sup>; Fátima Mercadillo<sup>208</sup>; Arie R. Mercado-Sesma<sup>157,158</sup>; Pablo Minguez<sup>26,27</sup>; Antonio J J. Molina<sup>188,77</sup>; Elena Molina-Roldán<sup>209</sup>; Juan José Montoya<sup>156</sup>; Vitor M.S. Moraes<sup>82</sup>; Patricia Moreira-Escriche<sup>110</sup>; Xenia Morelos-Arnedo<sup>65,20</sup>; Antonio Moreno-Docón<sup>55</sup>; Junior Moreno-Escalante<sup>20</sup>; Victor Moreno Cuerda<sup>1,2</sup>; Alberto Moreno Fernández<sup>91</sup>; Rubén Morilla<sup>78,210</sup>; Patricia Muñoz García<sup>211,98,6</sup>; Pablo Neira<sup>138</sup>; Julian Nevado<sup>27,137,212</sup>; Israel Nieto-Gañán<sup>142</sup>; Joana F.R. Nunes<sup>42</sup>; Rocio Nuñez-Torres<sup>28</sup>; Antònia Obrador-Hevia<sup>213,214</sup>; J. Gonzalo Ocejo-Vinyals<sup>45,47</sup>; Virginia Olivar<sup>138</sup>; Silviene F. Oliveira<sup>198,215,216,217,218</sup>; Lorena Ondo<sup>26,27</sup>; Alberto Orfao<sup>22,23,24,25</sup>; Luis Ortega<sup>219</sup>; Eva Ortega-Paino<sup>50</sup>; Fernando Ortiz-Flores<sup>45,47</sup>; Rocio Ortiz-Lopez<sup>220,80</sup>; José A. Oteo<sup>12,167</sup>; Harry Pachajoa<sup>221,222</sup>; Manuel Pacheco<sup>156</sup>; Fredy Javier Pacheco-Miranda<sup>20</sup>; Irene Padilla Conejo<sup>11</sup>; Sonia Panadero-Fajardo<sup>83</sup>; Mara Parellada<sup>31,37,6</sup>; Roberto Pariente-Rodríguez<sup>142</sup>; Estela Paz-Artal<sup>172,173,223</sup>; Germán Peces-Barba<sup>224,98</sup>; Miguel S. Pedromingo Kus<sup>225</sup>; Celia Perales<sup>135</sup>; Patricia Perez<sup>226</sup>; César Pérez<sup>227</sup>; Gustavo Perez-de-Nanclares<sup>33,87</sup>; Felipe Pérez-García<sup>228,229</sup>; Patricia Pérez-Matute<sup>167</sup>; Alexandra Pérez-Serra<sup>69,67</sup>; M. Elena Pérez-Tomás<sup>55</sup>; Teresa Perucho<sup>230</sup>; Lisbeth A. Pichardo<sup>11</sup>; Susana M.T. Pinho<sup>201,231,232</sup>; Mel-lina Pinsach-Abuin<sup>69,67</sup>; Luz Adriana Pinzón<sup>92,39</sup>; Guillermo Pita<sup>28</sup>; Francesc Pla-Junca<sup>233,27</sup>; Laura Planas-Serra<sup>86,27</sup>; Ericka N. Pompa-Mera<sup>234</sup>; Gloria L. Porrás-Hurtado<sup>156</sup>; Aurora Pujol<sup>86,27,235</sup>; María Eugenia Quevedo Chávez<sup>19,20</sup>; Maria Angeles Quijada<sup>32,236</sup>; Inés Quintela<sup>101</sup>; Diana Ramirez-Montaña<sup>237</sup>; Soraya Ramiro León<sup>144</sup>; Pedro Rascado Sedes<sup>238</sup>; Delia Recalde<sup>113,114</sup>; Emma Recio-Fernández<sup>167</sup>; Salvador Resino<sup>68,7</sup>; Adriana P. Ribeiro<sup>201,202,232</sup>; Carlos S. Rivadeneira-Chamorro<sup>39</sup>; Diana Roa-Agudelo<sup>51</sup>; Montserrat Robelo Pardo<sup>238</sup>; Marilyn Johanna Rodriguez<sup>39</sup>; Fernando Rodriguez-Artalejo<sup>111,112,77,177</sup>; Marena Rodríguez-Ferrer<sup>20</sup>; Carlos Rodríguez-Gallego<sup>239,240</sup>; José A. Rodríguez-García<sup>11</sup>; María A. Rodríguez-Hernandez<sup>72</sup>; Antonio Rodríguez-Nicolas<sup>153</sup>; Agustí Rodríguez-Palmero<sup>241,86</sup>; Emilio Rodríguez-Ruiz<sup>238,102</sup>; Paula A. Rodríguez-Urrego<sup>51</sup>; Belén Rodríguez Maya<sup>1</sup>; German Ezequiel Rodriguez Novoa<sup>138</sup>; Federico Rojo<sup>242,25</sup>; Andrea Romero-Coronado<sup>20</sup>; Filomeno Rondón García<sup>11</sup>; Lidia S. Rosa<sup>243</sup>; Antonio Rosales-Castillo<sup>244</sup>; Cladelis Rubio<sup>245,246</sup>; María Rubio Olivera<sup>35,36</sup>; Montserrat Ruiz<sup>86,27</sup>; Francisco Ruiz-Cabello<sup>153,179,247</sup>; Eva Ruiz-Casares<sup>230</sup>; Juan J. Ruiz-Cubillan<sup>45,47</sup>; Javier Ruiz-Hornillos<sup>248,36,249</sup>; Pablo Ryan<sup>250,251,252</sup>; Hector D. Salamanca<sup>38,39</sup>; Lorena Salazar-García<sup>79</sup>; Giorgina Gabriela Salgueiro Origlia<sup>91</sup>; Pedro-Luis Sánchez<sup>122,30</sup>; Clara Sánchez-Pablo<sup>122</sup>; Olga Sánchez-Pernaute<sup>253</sup>; Antonio J. Sánchez López<sup>254</sup>; María Concepción Sánchez Prados<sup>18</sup>; Javier Sánchez Real<sup>11</sup>; Jorge Sánchez Redondo<sup>1,255</sup>; Cristina Sancho-Sainz<sup>166</sup>; Anna Sangil<sup>63</sup>; Arnoldo Santos<sup>227</sup>; Ney P.C. Santos<sup>126</sup>; Agatha Schlüter<sup>86,27</sup>; Sonia Segovia<sup>233,256,257</sup>; Alex Serra-Llovich<sup>258</sup>; Fernando Sevil Puras<sup>8</sup>; Marta Sevilla Porrás<sup>27,137</sup>; Miguel A. Siculo<sup>259,260</sup>; Vivian N. Silbiger<sup>185</sup>; Nayara S. Silva<sup>109</sup>; Fabiola T.C. Silva<sup>42</sup>; Cristina Silván Fuentes<sup>27</sup>; Jordi Solé-Violán<sup>261,98,262</sup>; José Manuel Soria<sup>197</sup>; Jose V. Sorli<sup>95,96</sup>; Renata R. Sousa<sup>198</sup>; Juan Carlos Souto<sup>3</sup>; Karla S.C. Souza<sup>84</sup>; Vanessa S. Souza<sup>105</sup>; John J. Sprockel<sup>92,39</sup>; José Javier Suárez-Rama<sup>101</sup>; David A.

Suarez-Zamora<sup>51</sup>; Xiana Taboada-Fraga<sup>205</sup>; Eduardo Tamayo<sup>263,148</sup>; Alvaro Tamayo-Velasco<sup>264</sup>; Juan Carlos Taracido-Fernandez<sup>162</sup>; Nathali A.C. Tavares<sup>265</sup>; Carlos Tellería<sup>113,114</sup>; Jair Antonio Tenorio Castaño<sup>27,137,212</sup>; Alejandro Teper<sup>138</sup>; Juan Torres-Macho<sup>266</sup>; Lilian Torres-Tobar<sup>39</sup>; Ronald P. Torres Gutiérrez<sup>225</sup>; Jesús Troya<sup>250</sup>; Miguel Urioste<sup>208</sup>; Juan Valencia-Ramos<sup>267</sup>; Agustín Valido<sup>21,268</sup>; Juan Pablo Vargas Gallo<sup>269,270</sup>; Belén Varón<sup>271</sup>; Romero H.T. Vasconcelos<sup>265</sup>; Tomas Vega<sup>272</sup>; Santiago Velasco-Quirce<sup>273</sup>; Valentina Vélez-Santamaría<sup>85,86</sup>; Virginia Víctor<sup>35,36</sup>; Julia Vidán Estévez<sup>11</sup>; Miriam Vieitez-Santiago<sup>45,47</sup>; Carlos Vilches<sup>274</sup>; Lavinia Villalobos<sup>11</sup>; Felipe Villar<sup>224</sup>; Judit Villar-García<sup>275,276,277</sup>; Cristina Villaverde<sup>26,27</sup>; Pablo Villoslada-Blanco<sup>167</sup>; Ana Virseda-Berdices<sup>68</sup>; Zuleima Yáñez<sup>20</sup>; Antonio Zapatero-Gaviria<sup>278</sup>; Ruth Zarate<sup>279</sup>; Sandra Zazo<sup>242</sup>; Miguel López de Heredia<sup>27</sup>; Ingrid Mendes<sup>27</sup>; Rocío Moreno<sup>27</sup>; Esther Sande<sup>27,102,103</sup>; Carlos Flores<sup>280,97,98,240</sup>; José A. Riancho<sup>45,46,47</sup>; Augusto Rojas-Martínez<sup>80</sup>; Pablo Lapunzina<sup>27,137,212</sup>; Angel Carracedo<sup>101,27,102,103,136</sup>

### SCOURGE Cohort Group Affiliations

- <sup>1</sup>, Hospital Universitario Mostoles, Medicina Interna, Madrid, Spain
- <sup>2</sup>, Universidad Francisco de Vitoria, Madrid, Spain
- <sup>3</sup>, Haemostasis and Thrombosis Unit, Hospital de la Santa Creu i Sant Pau, IIB Sant Pau, Barcelona, Spain
- <sup>4</sup>, Unit of Infectious Diseases, Hospital Universitario 12 de Octubre, Instituto de Investigación Sanitaria Hospital 12 de Octubre (imas12), Madrid, Spain
- <sup>5</sup>, Spanish Network for Research in Infectious Diseases (REIPI RD16/0016/0002), Instituto de Salud Carlos III, Madrid, Spain
- <sup>6</sup>, School of Medicine, Universidad Complutense, Madrid, Spain
- <sup>7</sup>, Centro de Investigación Biomédica en Red de Enfermedades Infecciosas (CIBERINFEC), Instituto de Salud Carlos III, Madrid, Spain
- <sup>8</sup>, Hospital General Santa Bárbara de Soria, Soria, Spain
- <sup>9</sup>, Pediatric Neurology Unit, Department of Pediatrics, Navarra Health Service Hospital, Pamplona, Spain
- <sup>10</sup>, Navarra Health Service, NavarraBioMed Research Group, Pamplona, Spain
- <sup>11</sup>, Complejo Asistencial Universitario de León, León, Spain
- <sup>12</sup>, Hospital Universitario San Pedro, Infectious Diseases Department, Logroño, Spain
- <sup>13</sup>, Fundació Institut Guttmann, Institut Universitari de Neurorehabilitació adscrit a la UAB, Hospital de Neurorehabilitació, Barcelona, Spain
- <sup>14</sup>, Universitat Autònoma de Barcelona (UAB), Barcelona, Spain
- <sup>15</sup>, Fundació Institut d'Investigació en Ciències de la Salut Germans Trias i Pujol, Barcelona, Spain
- <sup>16</sup>, Hospital General de Occidente, Guadalajara, Mexico
- <sup>17</sup>, Microbiology Unit, Hospital Universitario N. S. de Candelaria, Santa Cruz de Tenerife, Spain
- <sup>18</sup>, Hospital Universitario La Paz-IDIPAZ, Servicio de Neumología, Madrid, Spain
- <sup>19</sup>, Camino Universitario Adelita de Char, Mired IPS, Barranquilla, Colombia
- <sup>20</sup>, Universidad Simón Bolívar, Facultad de Ciencias de la Salud, Barranquilla, Colombia
- <sup>21</sup>, Hospital Universitario Virgen Macarena, Neumología, Seville, Spain
- <sup>22</sup>, Departamento de Medicina, Universidad de Salamanca, Salamanca, Spain
- <sup>23</sup>, Centro de Investigación del Cáncer (IBMCC) Universidad de Salamanca - CSIC, Salamanca, Spain
- <sup>24</sup>, Biomedical Research Institute of Salamanca (IBSAL) Salamanca, Spain
- <sup>25</sup>, Centre for Biomedical Network Research on Cancer (CIBERONC), Instituto de Salud Carlos III, Madrid, Spain
- <sup>26</sup>, Department of Genetics & Genomics, Instituto de Investigación Sanitaria-Fundación Jiménez Díaz University Hospital - Universidad Autónoma de Madrid (IIS-FJD, UAM), Madrid, Spain
- <sup>27</sup>, Centre for Biomedical Network Research on Rare Diseases (CIBERER), Instituto de Salud Carlos III, Madrid, Spain
- <sup>28</sup>, Spanish National Cancer Research Centre, Human Genotyping-CEGEN Unit, Madrid, Spain

- <sup>29</sup>, Hospital Universitario de Salamanca-IBSAL, Servicio de Medicina Interna, Salamanca, Spain
- <sup>30</sup>, Universidad de Salamanca, Salamanca, Spain
- <sup>31</sup>, Department of Child and Adolescent Psychiatry, Institute of Psychiatry and Mental Health, Hospital General Universitario Gregorio Marañón (IiSGM), Madrid, Spain
- <sup>32</sup>, Clinical Pharmacology Service, Hospital de la Santa Creu i Sant Pau, IIB Sant Pau, Barcelona, Spain
- <sup>33</sup>, Biocruces Bizkai HRI, Barakaldo, Bizkaia, Spain
- <sup>34</sup>, Cruces University Hospital, Osakidetza, Barakaldo, Bizkaia, Spain
- <sup>35</sup>, Hospital Infanta Elena, Valdemoro, Madrid, Spain
- <sup>36</sup>, Instituto de Investigación Sanitaria-Fundación Jiménez Díaz University Hospital - Universidad Autónoma de Madrid (IIS-FJD, UAM), Madrid, Spain
- <sup>37</sup>, Centre for Biomedical Network Research on Mental Health (CIBERSAM), Instituto de Salud Carlos III, Madrid, Spain
- <sup>38</sup>, Fundación Hospital Infantil Universitario de San José, Bogotá, Colombia
- <sup>39</sup>, Fundación Universitaria de Ciencias de la Salud, Bogotá, Colombia
- <sup>40</sup>, Universidade Federal do Rio Grande do Norte, Programa de Pós-graduação em Ciências da Saúde, Natal, Brazil
- <sup>41</sup>, Universidade Federal do Rio Grande do Norte, Departamento de Medicina Clínica, Natal, Brazil
- <sup>42</sup>, Departamento de Genética e Morfologia, Instituto de Ciências Biológicas, Universidade de Brasília, Brasília, Brazil
- <sup>43</sup>, Colégio Marista de Brasília, Brazil
- <sup>44</sup>, Associação Brasileira de Educação e Cultura, Brazil
- <sup>45</sup>, IDIVAL, Santander, Spain
- <sup>46</sup>, Universidad de Cantabria, Santander, Spain
- <sup>47</sup>, Hospital U M Valdecilla, Santander, Spain
- <sup>48</sup>, Hospital Universitario La Paz-IDIPAZ, Servicio de Medicina Interna, Madrid, Spain
- <sup>49</sup>, Fundació Docència I Recerca Mutua Terrassa, Barcelona, Spain
- <sup>50</sup>, Spanish National Cancer Research Center, CNIO Biobank, Madrid, Spain
- <sup>51</sup>, Fundación Santa Fe de Bogota, Departamento Patología y Laboratorios, Bogotá, Colombia
- <sup>52</sup>, Hospital General de Occidente, Zapopan, Jalisco, Mexico
- <sup>53</sup>, Centro Universitario de Tonalá, Universidad de Guadalajara, Tonalá, Jalisco, Mexico
- <sup>54</sup>, Centro de Investigación Multidisciplinario en Salud, Universidad de Guadalajara, Tonalá, Jalisco, Mexico
- <sup>55</sup>, Instituto Murciano de Investigación Biosanitaria (IMIB-Arrixaca), Murcia, Spain
- <sup>56</sup>, Universidad Católica San Antonio de Murcia (UCAM), Murcia, Spain
- <sup>57</sup>, Hospital Universitario de Salamanca-IBSAL, Servicio de Medicina Interna-Unidad de Enfermedades Infecciosas, Salamanca, Spain
- <sup>58</sup>, Hospital Universitario de Fuenlabrada, Department of Internal Medicine, Madrid, Spain
- <sup>59</sup>, Escola Técnica de Saúde, Laboratório de Vigilância Molecular Aplicada, Pará, Brazil
- <sup>60</sup>, Federal University of Pernambuco, Genetics Postgraduate Program, Recife, PE, Brazil
- <sup>61</sup>, Hospital Universitario Infanta Leonor, Servicio de Alergia, Madrid, Spain
- <sup>62</sup>, Hospital Universitario del Tajo, Servicio de Medicina Intensiva, Aranjuez, Spain
- <sup>63</sup>, Hospital Universitario Mutua Terrassa, Barcelona, Spain
- <sup>64</sup>, Hospital Universitario La Paz-IDIPAZ, Servicio de Farmacología, Madrid, Spain
- <sup>65</sup>, Alcaldía de Barranquilla, Secretaría de Salud, Barranquilla, Colombia
- <sup>66</sup>, Instituto de Investigación Sanitaria de Santiago (IDIS), Xenética Cardiovascular, Santiago de Compostela, Spain
- <sup>67</sup>, Centre for Biomedical Network Research on Cardiovascular Diseases (CIBERCV), Instituto de Salud Carlos III, Madrid, Spain
- <sup>68</sup>, Unidad de Infección Viral e Inmunidad, Centro Nacional de Microbiología (CNM), Instituto de Salud Carlos III (ISCIII), Madrid, Spain
- <sup>69</sup>, Cardiovascular Genetics Center, Institut d'Investigació Biomèdica Girona (IDIBGI), Girona, Spain

- <sup>70</sup>, Medical Science Department, School of Medicine, University of Girona, Girona, Spain
- <sup>71</sup>, Hospital Josep Trueta, Cardiology Service, Girona, Spain
- <sup>72</sup>, Institute of Biomedicine of Seville (IBiS), Consejo Superior de Investigaciones Científicas (CSIC)-University of Seville- Virgen del Rocío University Hospital, Seville, Spain
- <sup>73</sup>, Division of Infectious Diseases, Instituto de Investigación Sanitaria-Fundación Jiménez Díaz University Hospital - Universidad Autónoma de Madrid (IIS-FJD, UAM), Madrid, Spain
- <sup>74</sup>, Intensive Care Unit, Hospital Universitario Insular de Gran Canaria, Las Palmas de Gran Canaria, Spain
- <sup>75</sup>, Hospital Universitario Mutua Terrassa, Terrassa, Spain
- <sup>76</sup>, Departamento de Medicina, Hospital Universitario Virgen del Rocío, Universidad de Sevilla, Seville, Spain
- <sup>77</sup>, Centre for Biomedical Network Research on Epidemiology and Public Health (CIBERESP), Instituto de Salud Carlos III, Madrid, Spain
- <sup>78</sup>, Instituto de Biomedicina de Sevilla, Seville, Spain
- <sup>79</sup>, Universidad de los Andes, Facultad de Ciencias, Bogotá, Colombia
- <sup>80</sup>, Tecnológico de Monterrey, Escuela de Medicina y Ciencias de la Salud and Hospital San Jose TecSalud, Monterrey, Mexico
- <sup>81</sup>, University of Fortaleza (UNIFOR), Department of Nutrition. Fortaleza, Brazil
- <sup>82</sup>, Departamento de Química, Faculdade de Filosofia, Ciências e Letras de Ribeirão Preto, Universidade de São Paulo, Brazil
- <sup>83</sup>, Andalusian Public Health System Biobank, Granada, Spain
- <sup>84</sup>, Universidade Federal do Rio Grande do Norte, Programa de Pós-Graduação em Ciências Farmacêuticas, Natal, Brazil
- <sup>85</sup>, Neuromuscular Unit, Neurology Department, Hospital Universitari de Bellvitge, L'Hospitalet de Llobregat (Barcelona), Spain
- <sup>86</sup>, Bellvitge Biomedical Research Institute (IDIBELL), Neurometabolic Diseases Laboratory, L'Hospitalet de Llobregat, Spain
- <sup>87</sup>, Osakidetza, Cruces University Hospital, Barakaldo, Bizkaia, Spain
- <sup>88</sup>, Centre for Biomedical Network Research on Diabetes and Metabolic Associated Diseases (CIBERDEM), Instituto de Salud Carlos III, Madrid, Spain
- <sup>89</sup>, University of Pais Vasco, UPV/EHU, Bizkaia, Spain
- <sup>90</sup>, Oncology and Genetics Unit, Instituto de Investigación Sanitaria Galicia Sur, Xerencia de Xestión Integrada de Vigo-Servizo Galego de Saúde, Vigo, Spain
- <sup>91</sup>, Hospital Universitario La Paz, Hospital Carlos III, Madrid, Spain
- <sup>92</sup>, Hospital de San José, Sociedad de Cirugía de Bogotá, Bogotá, Colombia
- <sup>93</sup>, Hospital Universitario Río Hortega, Valladolid, Spain
- <sup>94</sup>, Servicio de Medicina intensiva, Complejo Hospitalario Universitario de A Coruña (CHUAC), Sistema Galego de Saúde (SERGAS), A Coruña, Spain
- <sup>95</sup>, Valencia University, Preventive Medicine Department, Valencia, Spain
- <sup>96</sup>, Centre for Biomedical Network Research on Physiopathology of Obesity and Nutrition (CIBEROBN), Instituto de Salud Carlos III, Madrid, Spain
- <sup>97</sup>, Research Unit, Hospital Universitario N.S. de Candelaria, Santa Cruz de Tenerife, Spain
- <sup>98</sup>, Centre for Biomedical Network Research on Respiratory Diseases (CIBERES), Instituto de Salud Carlos III, Madrid, Spain
- <sup>99</sup>, Otto von Guericke University, Department of Microgravity and Translational Regenerative Medicine, Magdeburg, Germany
- <sup>100</sup>, Maternidade Escola Janário Cicco, Natal, Brazil
- <sup>101</sup>, Centro Nacional de Genotipado (CEGEN), Universidade de Santiago de Compostela, Santiago de Compostela, Spain
- <sup>102</sup>, Instituto de Investigación Sanitaria de Santiago (IDIS), Santiago de Compostela, Spain

- <sup>103</sup>, Centro Singular de Investigación en Medicina Molecular y Enfermedades Crónicas (CIMUS), Universidade de Santiago de Compostela, Santiago de Compostela, Spain
- <sup>104</sup>, Institute of Psychiatry and Mental Health, Hospital General Universitario Gregorio Marañón (IiSGM), Madrid, Spain
- <sup>105</sup>, Programa de Pós Graduação em Ciências da Saúde, Faculdade de Medicina, Universidade de Brasília, Brasília, Brazil
- <sup>106</sup>, Fundació Docència I Recerca Mutua Terrassa, Terrassa, Spain
- <sup>107</sup>, Hospital Universitario Mostoles, Unidad de Genética, Madrid, Spain
- <sup>108</sup>, Internal Medicine Department, Instituto de Investigación Sanitaria-Fundación Jiménez Díaz University Hospital - Universidad Autónoma de Madrid (IIS-FJD, UAM), Madrid, Spain
- <sup>109</sup>, Universidade Federal do Rio Grande do Norte, Pós-graduação em Biotecnologia - Rede de Biotecnologia do Nordeste (Renorbio), Natal, Brazil
- <sup>110</sup>, Hospital Universitario Severo Ochoa, Servicio de Medicina Interna, Madrid, Spain
- <sup>111</sup>, Department of Preventive Medicine and Public Health, School of Medicine, Universidad Autónoma de Madrid, Madrid, Spain
- <sup>112</sup>, IdiPaz (Instituto de Investigación Sanitaria Hospital Universitario La Paz), Madrid, Spain
- <sup>113</sup>, Instituto Aragonés de Ciencias de la Salud (IACS), Zaragoza, Spain
- <sup>114</sup>, Instituto Investigación Sanitaria Aragón (IIS-Aragon), Zaragoza, Spain
- <sup>115</sup>, Universidade Federal do Rio Grande do Norte, Programa de Pós Graduação em Nutrição, Natal, Brazil
- <sup>116</sup>, Preventive Medicine Department, Instituto de Investigación Sanitaria Galicia Sur, Xerencia de Xestión Integrada de Vigo-Servizo Galego de Saúde, Vigo, Spain
- <sup>117</sup>, Hospital Universitario Virgen del Rocío, Servicio de Medicina Interna, Seville, Spain
- <sup>118</sup>, Universidade Federal do Rio Grande do Norte, Departamento de Infectologia, Natal, Brazil
- <sup>119</sup>, Hospital de Doenças Infecciosas Giselda Trigueiro, Rio Grande do Norte, Natal, Brazil
- <sup>120</sup>, Unidad Diagnóstico Molecular. Fundación Rioja Salud, La Rioja, Spain
- <sup>121</sup>, Hospital Universitario Quironsalud Madrid, Madrid, Spain
- <sup>122</sup>, Hospital Universitario de Salamanca-IBSAL, Servicio de Cardiología, Salamanca, Spain
- <sup>123</sup>, Hospital Universitario Puerta de Hierro, Servicio de Medicina Interna, Majadahonda, Spain
- <sup>124</sup>, Biocruces Bizkaia Health Research Institute, Galdakao University Hospital, Osakidetza, Bizkaia, Spain
- <sup>125</sup>, Instituto Regional de Investigación en Salud-Universidad Nacional de Caaguazú, Caaguazú, Paraguay
- <sup>126</sup>, Universidade Federal do Pará, Núcleo de Pesquisas em Oncologia, Belém, Pará, Brazil
- <sup>127</sup>, Hospital Ophir Loyola, Departamento de Ensino e Pesquisa, Belém, Pará, Brazil
- <sup>128</sup>, Fundación Asilo San Jose, Santander, Spain
- <sup>129</sup>, Unidad de Enfermedades Infecciosas, Servicio de Medicina Interna, Hospital Universitario Puerta de Hierro, Instituto de Investigación Sanitaria Puerta de Hierro - Segovia de Arana, Madrid, Spain
- <sup>130</sup>, Universidad Nacional de Asunción, Facultad de Politécnica, Paraguay
- <sup>131</sup>, Urgencias Hospitalarias, Complejo Hospitalario Universitario de A Coruña (CHUAC), Sistema Galego de Saúde (SERGAS), A Coruña, Spain
- <sup>132</sup>, Grupo de Investigación en Interacciones Gen-Ambiente y Salud (GIIGAS) - Instituto de Biomedicina (IBIOMED), Universidad de León, León, Spain
- <sup>133</sup>, Hospital Universitario Niño Jesús, Pediatrics Department, Madrid, Spain
- <sup>134</sup>, Unitat de Malalties Infeccioses i Importades, Servei de Pediatria, Infectious and Imported Diseases, Pediatric Unit, Hospital Universitari Sant Joan de Deú, Barcelona, Spain
- <sup>135</sup>, Microbiology Department, Instituto de Investigación Sanitaria-Fundación Jiménez Díaz University Hospital - Universidad Autónoma de Madrid (IIS-FJD, UAM), Madrid, Spain
- <sup>136</sup>, Fundación Pública Galega de Medicina Xenómica, Sistema Galego de Saúde (SERGAS) Santiago de Compostela, Spain

- <sup>137</sup>, Instituto de Genética Médica y Molecular (INGEMM), Hospital Universitario La Paz-IDIPAZ, Madrid, Spain
- <sup>138</sup>, Hospital de Niños Ricardo Gutiérrez, Buenos Aires, Argentina
- <sup>139</sup>, Centre for Biomedical Network Research on Rare Diseases (CIBERER), Instituto de Salud Carlos III, Madrid, Spain Universidad Francisco de Vitoria, Madrid, Spain
- <sup>140</sup>, Osakidetza, Cruces University Hospital, Bizkaia, Spain
- <sup>141</sup>, University of Salamanca, Biomedical Research Institute of Salamanca (IBSAL), Salamanca, Spain
- <sup>142</sup>, Department of Immunology, IRYCIS, Hospital Universitario Ramón y Cajal, Madrid, Spain
- <sup>143</sup>, Hospital Infanta Elena, Servicio de Medicina Intensiva, Valdemoro, Madrid, Spain
- <sup>144</sup>, Hospital Universitario de Getafe, Servicio de Genética, Madrid, Spain
- <sup>145</sup>, Pneumology Department, Hospital General Universitario Gregorio Marañón (iiSGM), Madrid, Spain
- <sup>146</sup>, Ministerio de Salud Ciudad de Buenos Aires, Buenos Aires, Argentina
- <sup>147</sup>, Hospital Clínico Universitario de Valladolid, Unidad de Apoyo a la Investigación, Valladolid, Spain
- <sup>148</sup>, Universidad de Valladolid, Departamento de Cirugía, Valladolid, Spain
- <sup>149</sup>, Secretaria Municipal de Saude de Apodi, Natal, Brazil
- <sup>150</sup>, Sección Genética Médica - Servicio de Pediatría, Hospital Clínico Universitario Virgen de la Arrixaca, Servicio Murciano de Salud, Murcia, Spain
- <sup>151</sup>, Departamento Cirugía, Pediatría, Obstetricia y Ginecología, Facultad de Medicina, Universidad de Murcia (UMU), Murcia, Spain
- <sup>152</sup>, Grupo Clínico Vinculado, Centre for Biomedical Network Research on Rare Diseases (CIBERER), Instituto de Salud Carlos III, Madrid, Spain
- <sup>153</sup>, Hospital Universitario Virgen de las Nieves, Servicio de Análisis Clínicos e Inmunología, Granada, Spain
- <sup>154</sup>, Hospital Universitario Centro Dermatológico Federico Lleras Acosta, Bogotá, Colombia
- <sup>155</sup>, Intermediate Respiratory Care Unit, Department of Pneumology, Instituto de Investigación Sanitaria-Fundación Jiménez Díaz University Hospital - Universidad Autónoma de Madrid (IIS-FJD, UAM), Madrid, Spain
- <sup>156</sup>, Clinica Comfamiliar Risaralda, Pereira, Colombia
- <sup>157</sup>, Centro Universitario de Tonalá, Universidad de Guadalajara, Guadalajara, Mexico
- <sup>158</sup>, Centro de Investigación Multidisciplinario en Salud, Universidad de Guadalajara, Guadalajara, Mexico
- <sup>159</sup>, Unidad de Cuidados, Intensivos Hospital Clínico Universitario de Santiago (CHUS), Sistema Galego de Saúde (SERGAS), Santiago de Compostela, Spain
- <sup>160</sup>, IIS La Fe, Plataforma de Farmacogenética, Valencia, Spain
- <sup>161</sup>, Universidad de Valencia, Departamento de Farmacología, Valencia, Spain
- <sup>162</sup>, Data Analysis Department, Instituto de Investigación Sanitaria-Fundación Jiménez Díaz University Hospital - Universidad Autónoma de Madrid (IIS-FJD, UAM), Madrid, Spain
- <sup>163</sup>, Hospital del Mar, Infectious Diseases Service, Barcelona, Spain
- <sup>164</sup>, Institut Hospital del Mar d'Investigacions Mèdiques (IMIM), Barcelona, Spain
- <sup>165</sup>, CEXS-Universitat Pompeu Fabra, Spanish Network for Research in Infectious Diseases (REIPI), Barcelona, Spain
- <sup>166</sup>, Biocruces Bizkaia Health Research Institute, Basurto University Hospital, Osakidetza, Bizkaia, Spain
- <sup>167</sup>, Infectious Diseases, Microbiota and Metabolism Unit, Center for Biomedical Research of La Rioja (CIBIR), Logroño, Spain
- <sup>168</sup>, Sabin Medicina Diagnóstica, Brazil
- <sup>169</sup>, Ophthalmology Department, Instituto de Investigación Sanitaria-Fundación Jiménez Díaz University Hospital - Universidad Autónoma de Madrid (IIS-FJD, UAM), Madrid, Spain
- <sup>170</sup>, Hospital Sant Joan de Deu, Pediatric Critical Care Unit, Barcelona, Spain
- <sup>171</sup>, Paediatric Intensive Care Unit, Agrupación Hospitalaria Clínic-Sant Joan de Déu, Esplugues de Llobregat, Barcelona, Spain
- <sup>172</sup>, Hospital Universitario 12 de Octubre, Department of Immunology, Madrid, Spain



- <sup>173</sup>, Instituto de Investigación Sanitaria Hospital 12 de Octubre (imas12), Transplant Immunology and Immunodeficiencies Group, Madrid, Spain
- <sup>174</sup>, SIGEN Alianza Universidad de los Andes - Fundación Santa Fe de Bogotá, Bogotá, Colombia
- <sup>175</sup>, Hospital General de Segovia, Medicina Intensiva, Segovia, Spain
- <sup>176</sup>, Clinical Trials Unit, Instituto de Investigación Sanitaria-Fundación Jiménez Díaz University Hospital - Universidad Autónoma de Madrid (IIS-FJD, UAM), Madrid, Spain
- <sup>177</sup>, IMDEA-Food Institute, CEI UAM+CSIC, Madrid, Spain
- <sup>178</sup>, Hospital Universitario Virgen de las Nieves, Servicio de Enfermedades Infecciosas, Granada, Spain
- <sup>179</sup>, Instituto de Investigación Biosanitaria de Granada (ibs GRANADA), Granada, Spain
- <sup>180</sup>, Universidad de Granada, Departamento de Medicina, Granada, Spain
- <sup>181</sup>, Hospital Universitario La Paz-IDIPAZ, Servicio de Inmunología, Madrid, Spain
- <sup>182</sup>, La Paz Institute for Health Research (IdiPAZ), Lymphocyte Pathophysiology in Immunodeficiencies Group, Madrid, Spain
- <sup>183</sup>, Intensive Care Unit, Hospital Universitario de Canarias, La Laguna, Spain
- <sup>184</sup>, Dirección General de Salud Pública, Consejería de Sanidad, Junta de Castilla y León, Valladolid, Spain
- <sup>185</sup>, Universidade Federal do Rio Grande do Norte, Departamento de Análises Clínicas e Toxicológicas, Natal, Brazil
- <sup>186</sup>, Fundación Jiménez Díaz, Epidemiology, Madrid, Spain
- <sup>187</sup>, Universidad Autónoma de Madrid, Department of Medicine, Madrid, Spain
- <sup>188</sup>, Instituto de Biomedicina (IBIOMED), Universidad de León, León, Spain
- <sup>189</sup>, Intensive Care Unit, Hospital Universitario N. S. de Candelaria, Santa Cruz de Tenerife, Spain
- <sup>190</sup>, Preventive Medicine Department, Instituto de Investigación Sanitaria-Fundación Jiménez Díaz University Hospital - Universidad Autónoma de Madrid (IIS-FJD, UAM), Madrid, Spain
- <sup>191</sup>, Universidad de Valladolid, Departamento de Medicina, Valladolid, Spain
- <sup>192</sup>, Hospital Universitario Infanta Leonor, Servicio de Medicina Intensiva, Madrid, Spain
- <sup>193</sup>, Servicio de Medicina Interna, Sanatorio Franchin, Buenos Aires, Argentina
- <sup>194</sup>, Hospital Universitario del Tajo, Servicio de Medicina Intensiva, Toledo, Spain
- <sup>195</sup>, Unidad de Genética y Genómica Islas Baleares, Islas Baleares, Spain
- <sup>196</sup>, Hospital Universitario Son Espases, Unidad de Diagnóstico Molecular y Genética Clínica, Islas Baleares, Spain
- <sup>197</sup>, Genomics of Complex Diseases Unit, Research Institute of Hospital de la Santa Creu i Sant Pau, IIB Sant Pau, Barcelona, Spain
- <sup>198</sup>, Faculdade de Medicina, Universidade de Brasília, Brasília, Brazil
- <sup>199</sup>, Programa de Pós-Graduação em Ciências Médicas, Universidade de Brasília, Brasília, Brazil
- <sup>200</sup>, Programa de Pós-Graduação em Ciências da Saúde, Universidade de Brasília, Brasília, Brazil
- <sup>201</sup>, Hospital das Forças Armadas, Brazil
- <sup>202</sup>, Exército Brasileiro, Brazil
- <sup>203</sup>, Hospital El Bierzo, Gerencia de Asistencia Sanitaria del Bierzo (GASBI), Gerencia Regional de Salud (SACYL), Ponferrada, Spain
- <sup>204</sup>, Grupo INVESTEN, Instituto de Salud Carlos III, Madrid, Spain
- <sup>205</sup>, Unidad de Cuidados Intensivos, Complejo Universitario de A Coruña (CHUAC), Sistema Galego de Saúde (SERGAS), A Coruña, Spain
- <sup>206</sup>, Hospital Universitario La Paz-IDIPAZ, Servicio de Pediatría, Madrid, Spain
- <sup>207</sup>, Hospital El Bierzo, Unidad Cuidados Intensivos, León, Spain
- <sup>208</sup>, Spanish National Cancer Research Centre, Familial Cancer Clinical Unit, Madrid, Spain
- <sup>209</sup>, Instituto de Investigación Sanitaria San Carlos (IdISSC), Hospital Clínico San Carlos (HCSC), Madrid, Spain
- <sup>210</sup>, Universidad de Sevilla, Departamento de Enfermería, Seville, Spain
- <sup>211</sup>, Hospital General Universitario Gregorio Marañón (IiSGM), Madrid, Spain
- <sup>212</sup>, ERN-ITHACA-European Reference Network

- <sup>213</sup>, Unidad de Genética y Genómica Islas Baleares, Unidad de Diagnóstico Molecular y Genética Clínica, Hospital Universitario Son Espases, Islas Baleares, Spain
- <sup>214</sup>, Instituto de Investigación Sanitaria Islas Baleares (IdISBa), Islas Baleares, Spain
- <sup>215</sup>, Programa de Pós-Graduação em Biologia Animal, Universidade de Brasília, Brasília, Brazil
- <sup>216</sup>, Programa de Pós-Graduação em Ciências da Saúde, Universidade de Brasília, Brasília, Brazil
- <sup>217</sup>, Programa de Pós-Graduação Profissional em Ensino de Biologia, Universidade de Brasília, Brasília, Brazil
- <sup>218</sup>, Programa de Pós-Graduação em Ciências Médicas, Universidade de Brasília, Brasília, Brazil
- <sup>219</sup>, Anatomía Patológica, Instituto de Investigación Sanitaria San Carlos (IdISSC), Hospital Clínico San Carlos (HCSC), Madrid, Spain
- <sup>220</sup>, Tecnológico de Monterrey, Monterrey, Mexico
- <sup>221</sup>, Centro de Investigación en Anomalías Congénitas y Enfermedades Raras (CIACER), Universidad Icesi
- <sup>222</sup>, Departamento de Genética, Fundación Valle del Lili
- <sup>223</sup>, Universidad Complutense de Madrid, Department of Immunology, Ophthalmology and ENT, Madrid, Spain
- <sup>224</sup>, Department of Neumology, Instituto de Investigación Sanitaria-Fundación Jiménez Díaz University Hospital - Universidad Autónoma de Madrid (IIS-FJD, UAM), Madrid, Spain
- <sup>225</sup>, Hospital Nuestra Señora de Sonsoles, Ávila, Spain
- <sup>226</sup>, Inditex, A Coruña, Spain
- <sup>227</sup>, Intensive Care Department, Instituto de Investigación Sanitaria-Fundación Jiménez Díaz University Hospital - Universidad Autónoma de Madrid (IIS-FJD, UAM), Madrid, Spain
- <sup>228</sup>, Hospital Universitario Príncipe de Asturias, Servicio de Microbiología Clínica, Madrid, Spain
- <sup>229</sup>, Universidad de Alcalá de Henares, Departamento de Biomedicina y Biotecnología, Facultad de Medicina y Ciencias de la Salud, Madrid, Spain
- <sup>230</sup>, GENYCA, Madrid, Spain
- <sup>231</sup>, Marinha do Brasil, Brazil
- <sup>232</sup>, Universidade de Brasília, Brasilia, Brazil
- <sup>233</sup>, Neuromuscular Diseases Unit, Department of Neurology, Hospital de la Santa Creu i Sant Pau, Universitat Autònoma de Barcelona, Barcelona, Spain
- <sup>234</sup>, Instituto Mexicano del Seguro Social (IMSS), Centro Médico Nacional Siglo XXI, Unidad de Investigación Médica en Enfermedades Infecciosas y Parasitarias, Mexico City, Mexico
- <sup>235</sup>, Catalan Institution of Research and Advanced Studies (ICREA), Barcelona, Spain
- <sup>236</sup>, Drug Research Centre, Institut d'Investigació Biomèdica Sant Pau, IIB-Sant Pau, Barcelona, Spain
- <sup>237</sup>, Departamento de Genética, Clínica imbanaco
- <sup>238</sup>, Unidad de Cuidados Intensivos, Hospital Clínico Universitario de Santiago (CHUS), Sistema Galego de Saúde (SERGAS), Santiago de Compostela, Spain
- <sup>239</sup>, Department of Immunology, Hospital Universitario de Gran Canaria Dr. Negrín, Las Palmas de Gran Canaria, Spain
- <sup>240</sup>, Department of Clinical Sciences, University Fernando Pessoa Canarias, Las Palmas de Gran Canaria, Spain
- <sup>241</sup>, University Hospital Germans Trias i Pujol, Pediatrics Department, Badalona, Spain
- <sup>242</sup>, Department of Pathology, Biobank, Instituto de Investigación Sanitaria-Fundación Jiménez Díaz University Hospital - Universidad Autónoma de Madrid (IIS-FJD, UAM), Madrid, Spain
- <sup>243</sup>, Faculdade de Ciências da Saúde, Universidade de Brasília, Brasilia, Brazil
- <sup>244</sup>, Hospital Universitario Virgen de las Nieves, Servicio de Medicina Interna, Granada, Spain
- <sup>245</sup>, Fundación Universitaria de Ciencias de la Salud, Grupo de Ciencias Básicas en Salud (CBS), Bogotá, Colombia
- <sup>246</sup>, Sociedad de Cirugía de Bogotá, Hospital de San José, Bogotá, Colombia
- <sup>247</sup>, Universidad de Granada, Departamento Bioquímica, Biología Molecular e Inmunología III, Granada, Spain

- <sup>248</sup>, Hospital Infanta Elena, Allergy Unit, Valdemoro, Madrid, Spain
- <sup>249</sup>, Faculty of Medicine, Universidad Francisco de Vitoria, Madrid, Spain
- <sup>250</sup>, Hospital Universitario Infanta Leonor, Madrid, Spain
- <sup>251</sup>, Complutense University of Madrid, Madrid, Spain
- <sup>252</sup>, Gregorio Marañón Health Research Institute (IISGM), Madrid, Spain
- <sup>253</sup>, Reumatology Service, Instituto de Investigación Sanitaria-Fundación Jiménez Díaz University Hospital - Universidad Autónoma de Madrid (IIS-FJD, UAM), Madrid, Spain
- <sup>254</sup>, Biobank, Puerta de Hierro-Segovia de Arana Health Research Institute, Madrid, Spain
- <sup>255</sup>, Universidad Rey Juan Carlos, Madrid, Spain
- <sup>256</sup>, The John Walton Muscular Dystrophy Research Centre, Newcastle University and Newcastle Hospitals NHS Foundation Trust, Newcastle upon Tyne, UK.
- <sup>257</sup>, Neuromuscular Unit, Neuropediatrics Department, Institut de Recerca Sant Joan de Déu, Hospital Sant Joan de Déu, Spain
- <sup>258</sup>, Fundació Docència i Recerca Mutua Terrassa, Terrassa, Spain
- <sup>259</sup>, Casa de Saúde São Lucas, Natal, Brazil
- <sup>260</sup>, Hospital Rio Grande, Rio Grande do Norte, Natal, Brazil
- <sup>261</sup>, Intensive Care Unit, Hospital Universitario de Gran Canaria Dr. Negrín, Las Palmas de Gran Canaria, Spain
- <sup>262</sup>, Universidad Fernando Pessoa Canarias, Las Palmas de Gran Canaria, Spain
- <sup>263</sup>, Hospital Clinico Universitario de Valladolid, Servicio de Anestesiología y Reanimación, Valladolid, Spain
- <sup>264</sup>, Hospital Clinico Universitario de Valladolid, Servicio de Hematología y Hemoterapia, Valladolid, Spain
- <sup>265</sup>, Hospital Universitario Lauro Wanderley, Brazil
- <sup>266</sup>, Hospital Universitario Infanta Leonor, Servicio de Medicina Interna, Madrid, Spain
- <sup>267</sup>, University Hospital of Burgos, Burgos, Spain
- <sup>268</sup>, Universidad de Sevilla, Seville, Spain
- <sup>269</sup>, Fundación Santa Fe de Bogota, Instituto de servicios medicos de Emergencia y trauma, Bogotá, Colombia
- <sup>270</sup>, Universidad de los Andes, Bogotá, Colombia
- <sup>271</sup>, Quironprevención, A Coruña, Spain
- <sup>272</sup>, Junta de Castilla y León, Consejería de Sanidad, Valladolid, Spain
- <sup>273</sup>, Gerencia Atención Primaria de Burgos, Burgos, Spain
- <sup>274</sup>, Immunogenetics-Histocompatibility group, Servicio de Inmunología, Instituto de Investigación Sanitaria Puerta de Hierro - Segovia de Arana, Madrid, Spain
- <sup>275</sup>, Hospital del Mar, Department of Infectious Diseases, Barcelona, Spain
- <sup>276</sup>, IMIM (Hospital del Mar Medical Research Institute, Institut Hospital del Mar d'Investigacions Mediques), Barcelona, Spain
- <sup>277</sup>, Universitat Autònoma de Barcelona, Department of Medicine, Spain
- <sup>278</sup>, Consejería de Sanidad, Comunidad de Madrid, Madrid, Spain
- <sup>279</sup>, Centro para el Desarrollo de la Investigación Científica, Asunción, Paraguay
- <sup>280</sup>, Genomics Division, Instituto Tecnológico y de Energías Renovables, Santa Cruz de Tenerife, Spain
